# Supplementary material for: Stability of Transmembrane Amyloid β-Peptide and Membrane Integrity Tested by Molecular Modeling of Site-Specific Aβ 42 Mutations
Source: PubMed Central journal article supplement (PMC3820573; doi:10.1371/journal.pone.0078399), 2013-11-07
Supplement: pone.0078399.s001.pdf [file pone.0078399.s001.pdf]

## Supporting Information

### **Stability of transmembrane amyloid $\beta$ -peptide and membrane integrity tested by site-specific A $\beta_{42}$ mutations**

Chetan Poojari<sup>1</sup> , Birgit Strodel<sup>1,2,\*</sup>

<sup>1</sup> Forschungszentrum Jülich GmbH, Institute of Complex Systems: Structural Biochemistry (ICS-6), 52425 Jülich, Germany

<sup>2</sup> Institute of Theoretical and Computational Chemistry, Heinrich Heine University Düsseldorf, Universitätsstr. 1, 40225 Düsseldorf, Germany

\* E-mail: b.strodel@fz-juelich.de

## Secondary structure of WT A $\beta_{42}$

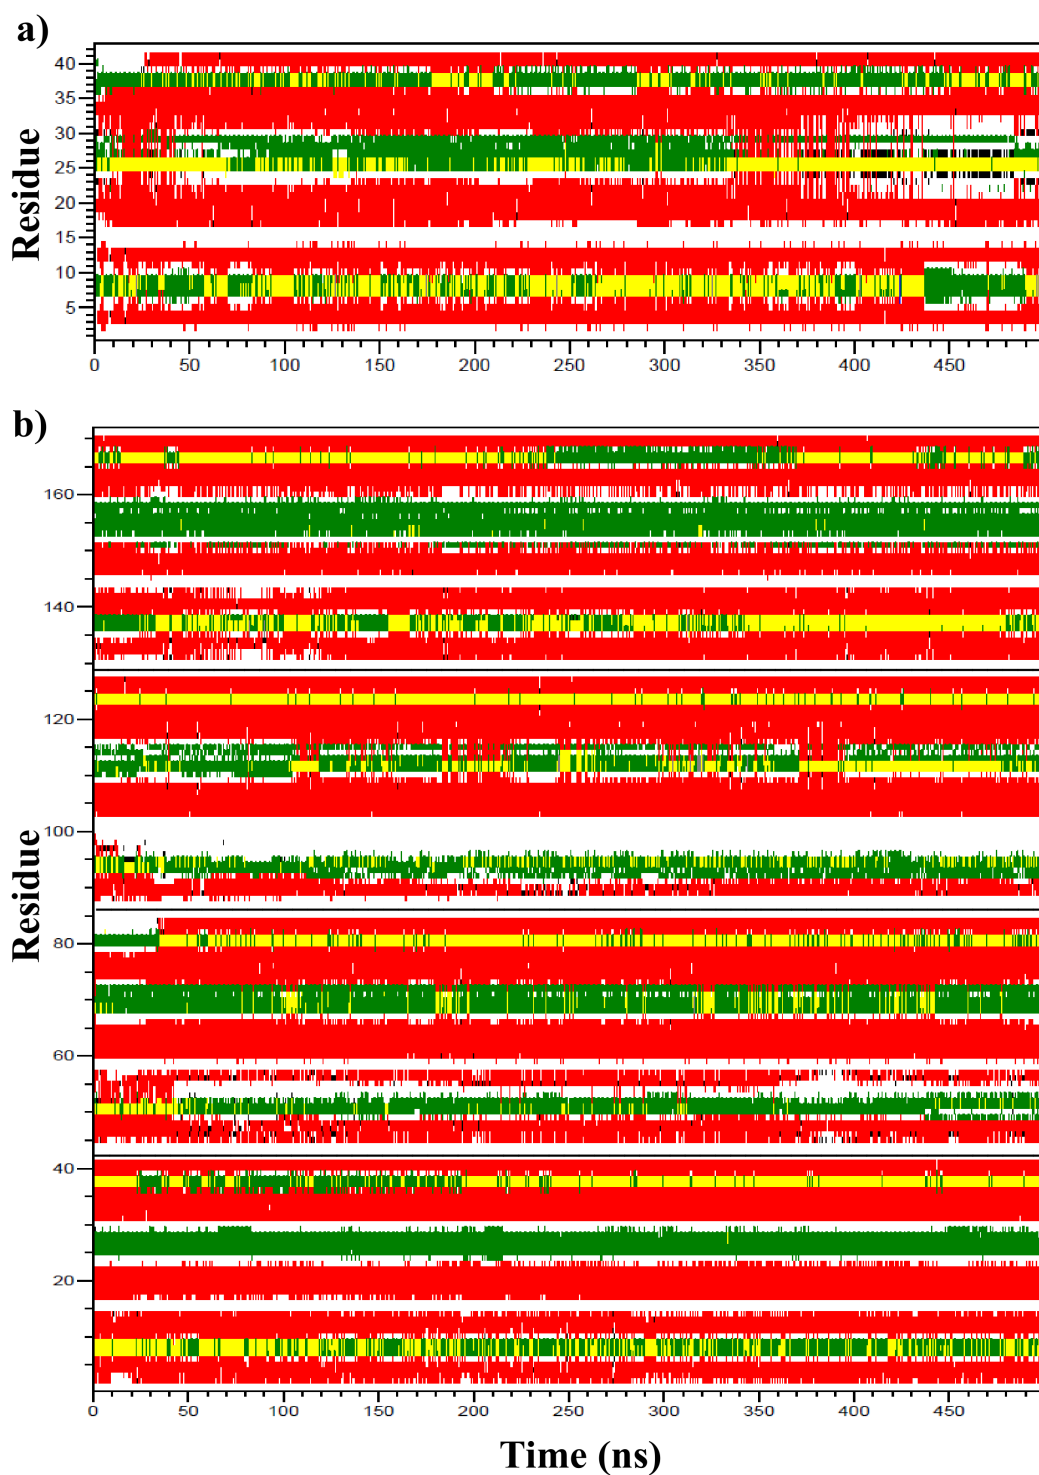

**Figure S1:** Secondary structure analysis for the 500 ns MD simulations of WT A $\beta_{1-42}$  as (a)  $\beta$ -sheet monomer and (b)  $\beta$ -sheet tetramer in a POPC bilayer. For the  $\beta$ -sheet tetramer, the four peptides are separated by black lines. Legend: white, coil; red,  $\beta$ -sheet; black,  $\beta$ -bridge; green, bend; yellow, turn.

## Secondary structure of mutant A $\beta_{42}$ (monomer)

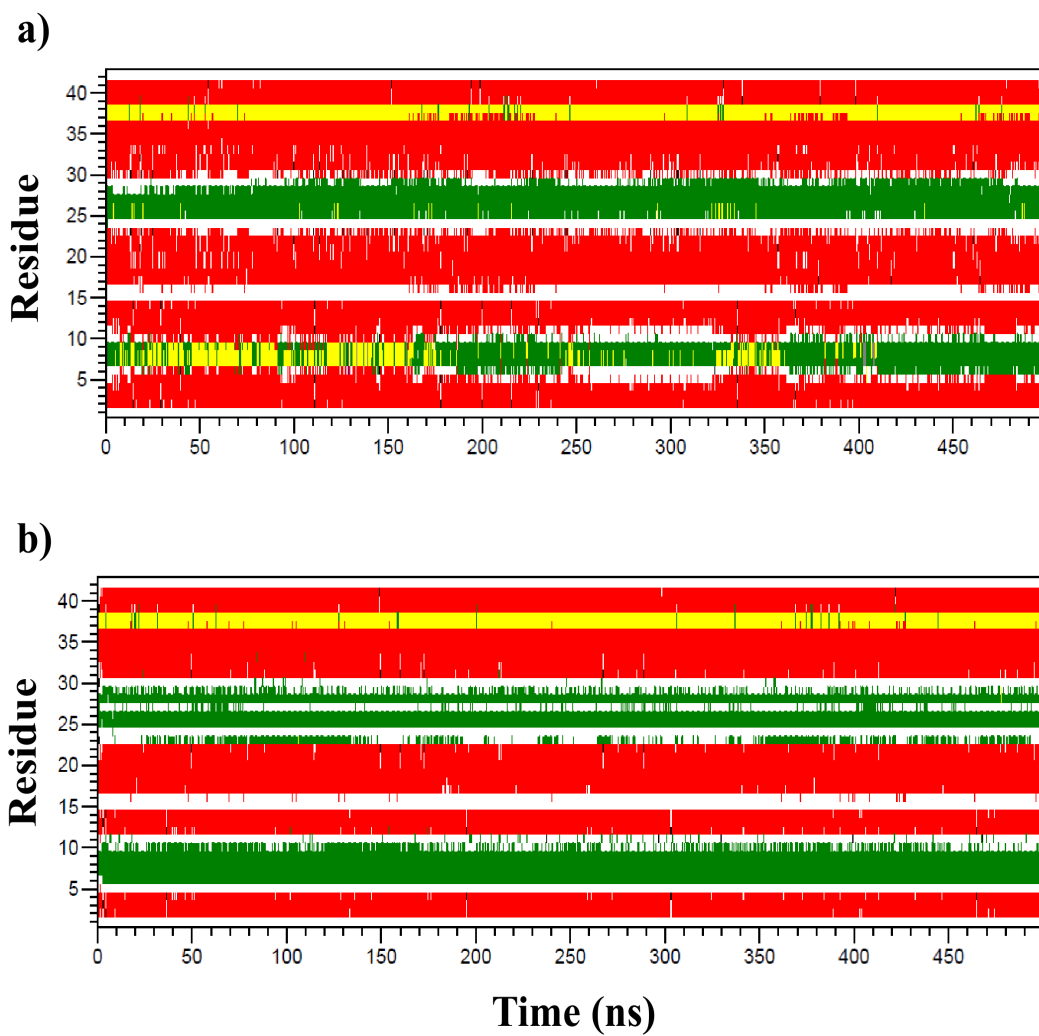

**Figure S2:** Secondary structure analysis for the 500 ns MD simulations of mutant A $\beta_{1-42}$  monomer as (a) E22G, (b) D23G in a POPC bilayer. Legend: white, coil; red,  $\beta$ -sheet; black,  $\beta$ -bridge; green, bend; yellow, turn.

## Secondary structure for mutant A $\beta_{42}$ (monomer)

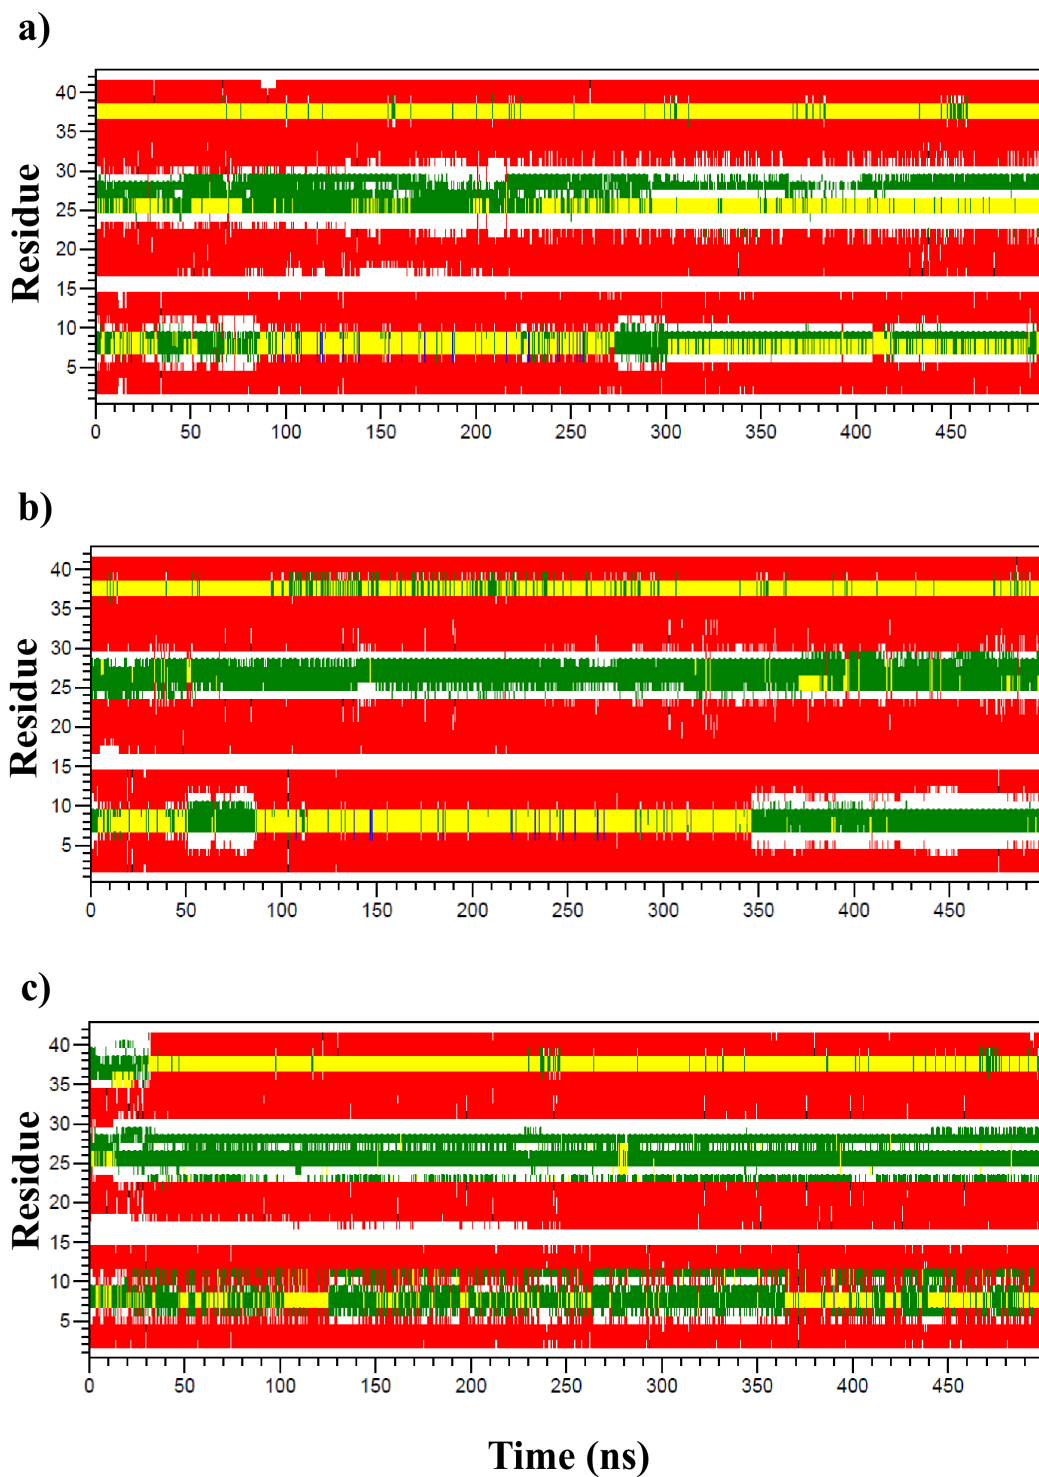

**Figure S3:** Secondary structure analysis for the 500 ns MD simulations of mutant A $\beta_{1-42}$  monomer as (a) E22G/D23G, (b) K16M/K28M, (c) K16M/E22G/D23G/K28M in a POPC bilayer. Legend: white, coil; red,  $\beta$ -sheet; black,  $\beta$ -bridge; green, bend; yellow, turn.

## Secondary structure for E22G mutant A $\beta$ <sub>1-42</sub> (tetramer)

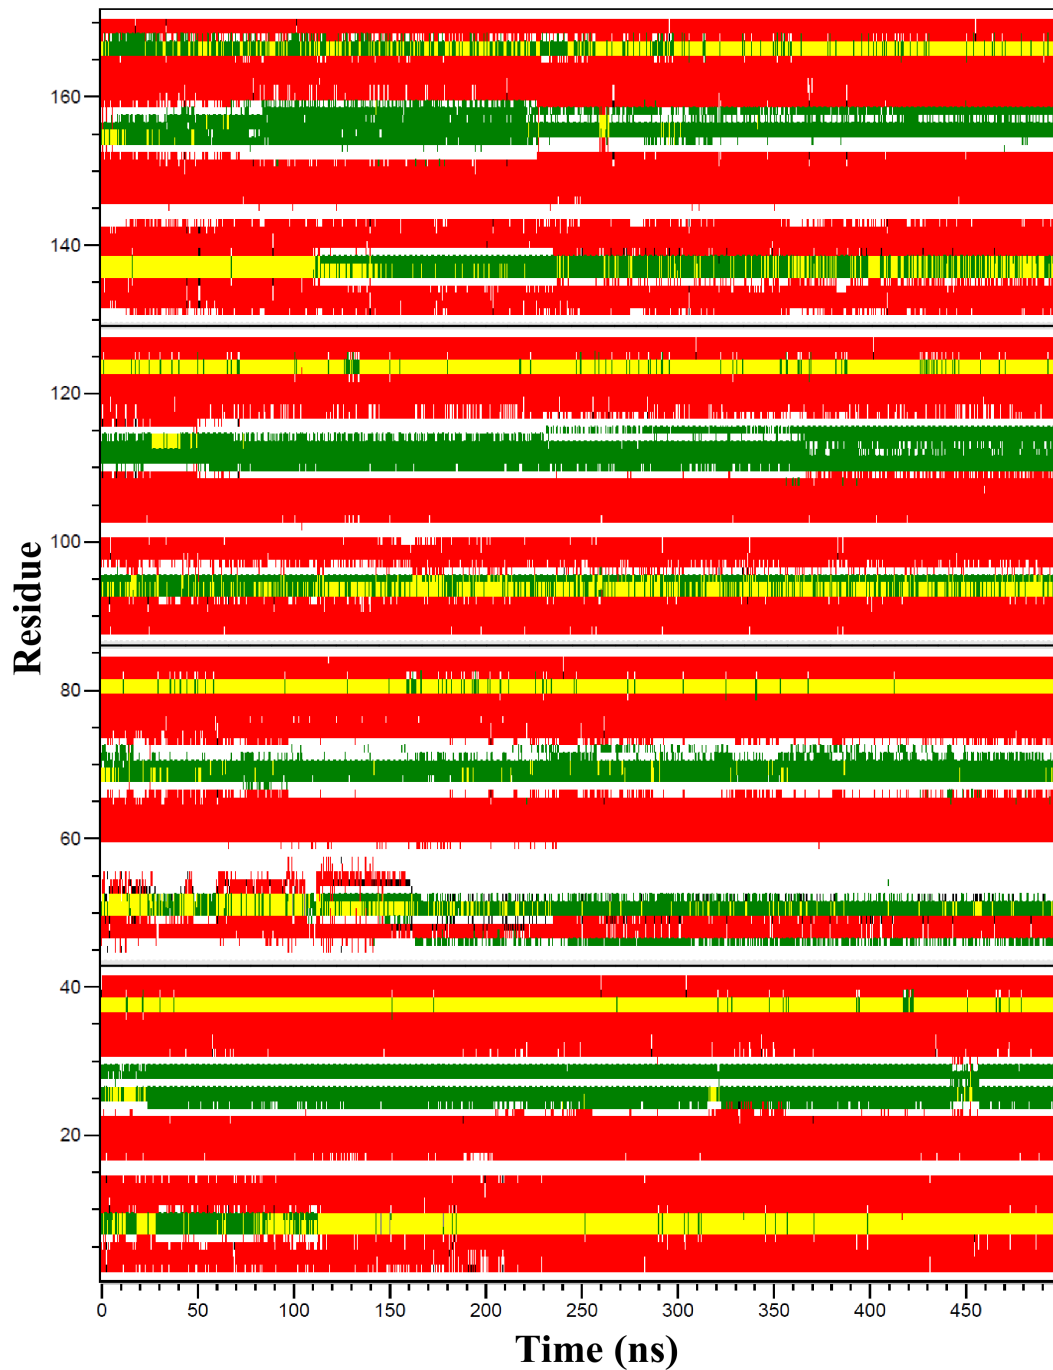

**Figure S4:** Secondary structure analysis for the 500 ns MD simulation of E22G A $\beta$ <sub>1-42</sub> tetramer in a POPC bilayer. The four peptides are separated by black lines. Legend: white, coil; red,  $\beta$ -sheet; black,  $\beta$ -bridge; green, bend; yellow, turn.

## Secondary structure for D23G mutant A $\beta_{1-42}$ (tetramer)

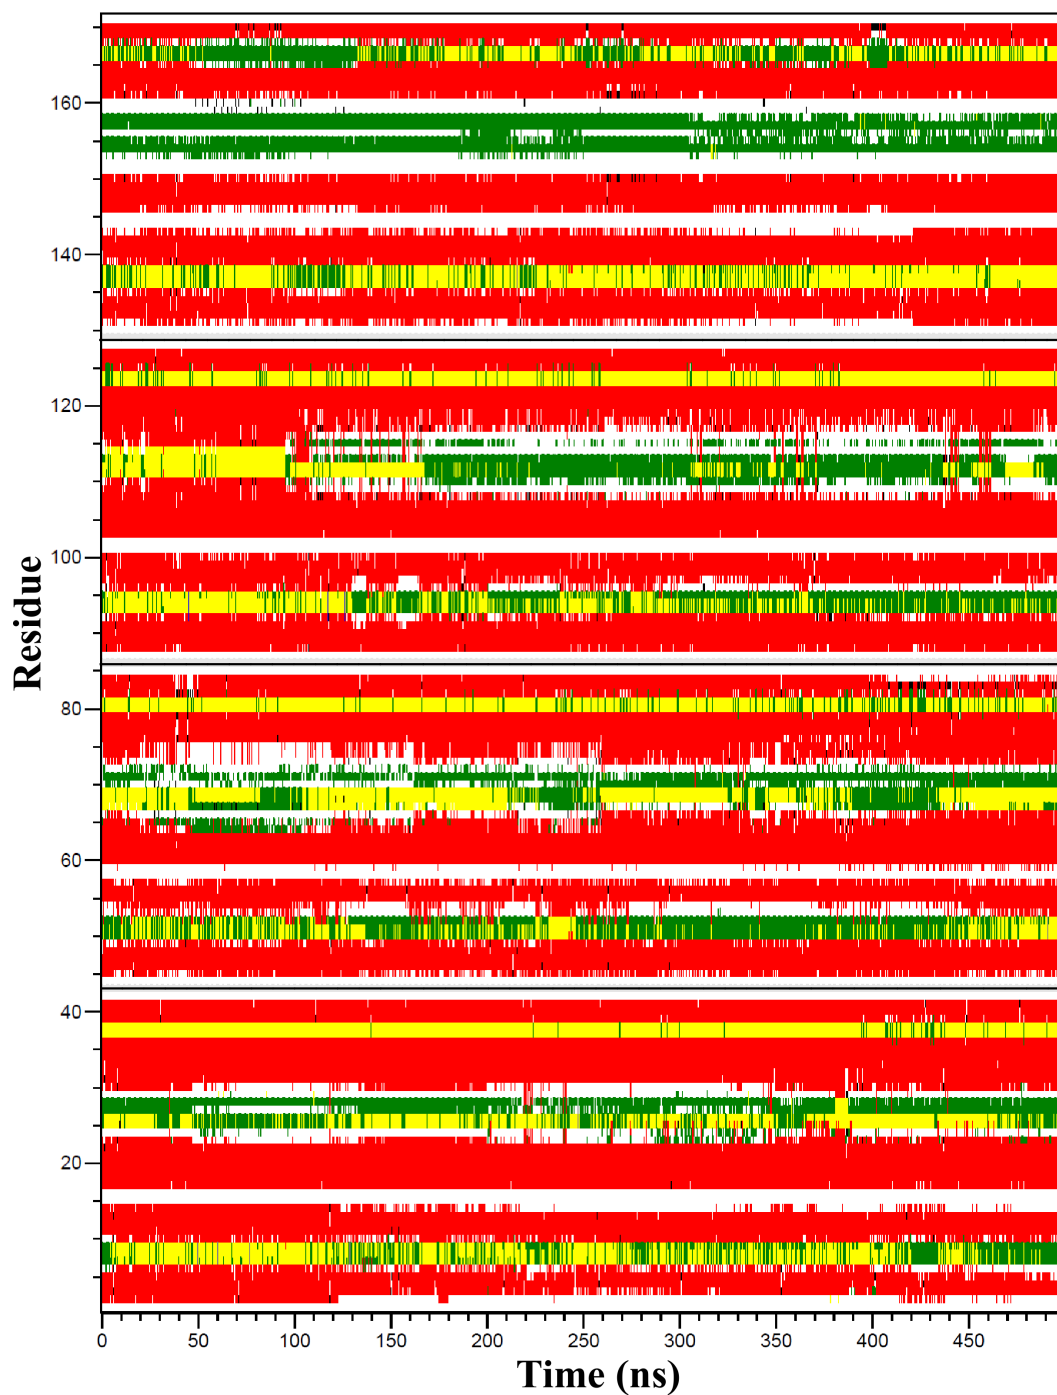

**Figure S5:** Secondary structure analysis for the 500 ns MD simulation of D23G A $\beta_{1-42}$  tetramer in a POPC bilayer. The four peptides are separated by black lines. Legend: white, coil; red,  $\beta$ -sheet; black,  $\beta$ -bridge; green, bend; yellow, turn.

### D23-K28 salt bridge in the sheet structure

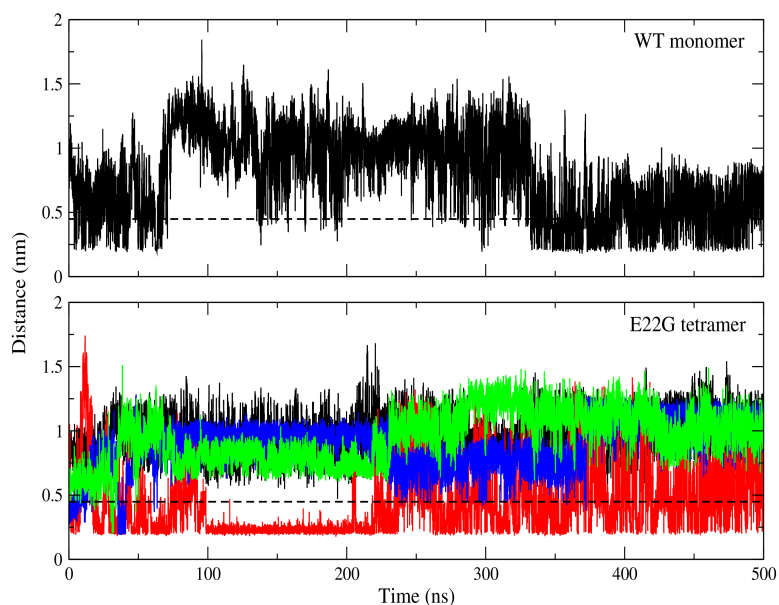

**Figure S6:** Minimum distance between the anionic carboxylate of D23 and the cationic ammonium from K28 in the WT monomer and the E2G tetramer. For E2G tetramer, this distance is analysed for all four peptides. The black dashed line at 0.45 nm corresponds to the cutoff distance to define a salt bridge in a protein. This analysis was performed for all systems studied. Only for the two systems, where salt bridge formation was observed, results are shown here.

### Peptide-lipid interactions for E2G monomer

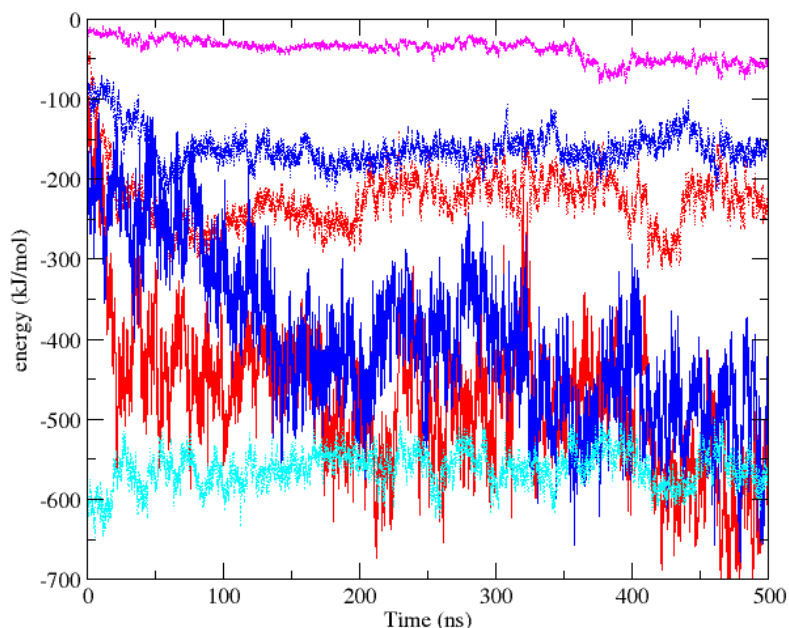

**Figure S7:** Peptide-lipid interactions for the E2G monomer decomposed into Coulomb (solid) and Lennard-Jones (LJ) interactions (dashed). Shown are the interactions of residues 1–16 with the lipid headgroups (red, Coulomb and LJ) and lipid tails (magenta, LJ), and of residues 17–42 with the lipid headgroups (blue, Coulomb and LJ) and lipid tails (cyan, LJ).

## Analysis of bilayer thickness for wild type $A\beta_{1-42}$

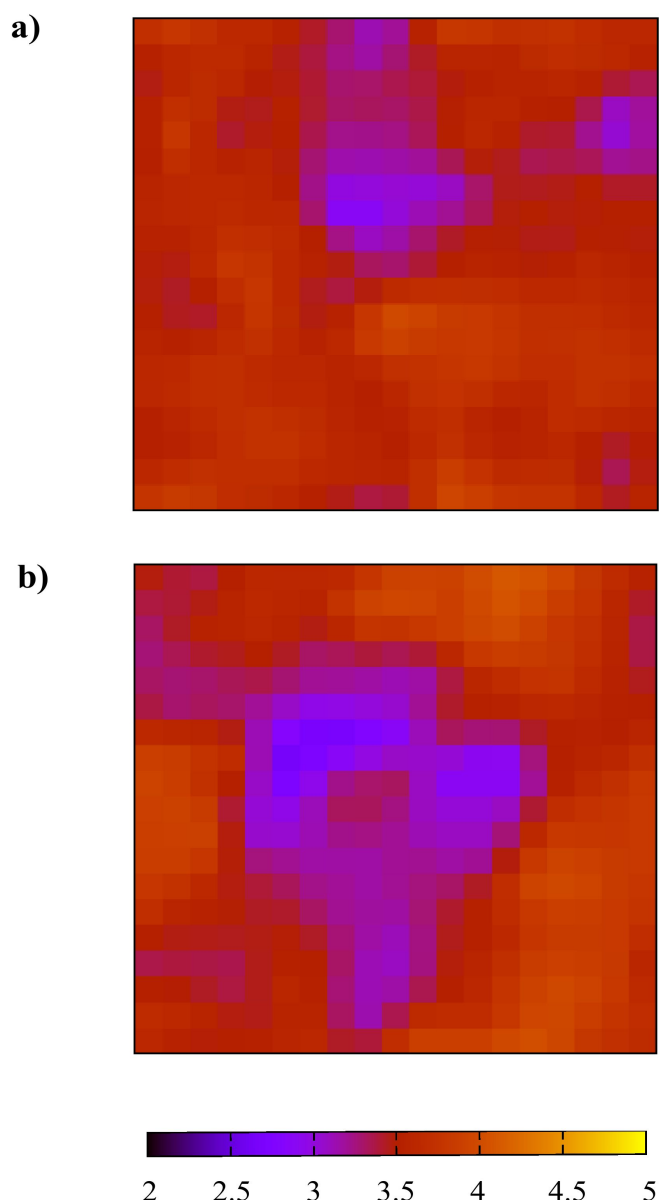

**Figure S8:** Bilayer phosphate-to-phosphate thickness, averaged over the last 400 ns of the 500 ns MD simulations of WT  $A\beta_{1-42}$  as (a)  $\beta$ -sheet monomer and (b)  $\beta$ -sheet tetramer in a POPC bilayer. The axes of each plot corresponds to the x- and y- direction of the lipid bilayer (both about 6.5 nm). The bilayer thickness was calculated with GRIDMAT-MD using 20 grid points in both directions. In each case, the peptide (not shown) is located near the center of each square where the thickness is smallest. The legend shows bilayer thickness (nm), mapped to the corresponding colors.



### Analysis of bilayer thickness for mutant $A\beta_{1-42}$ (monomer)

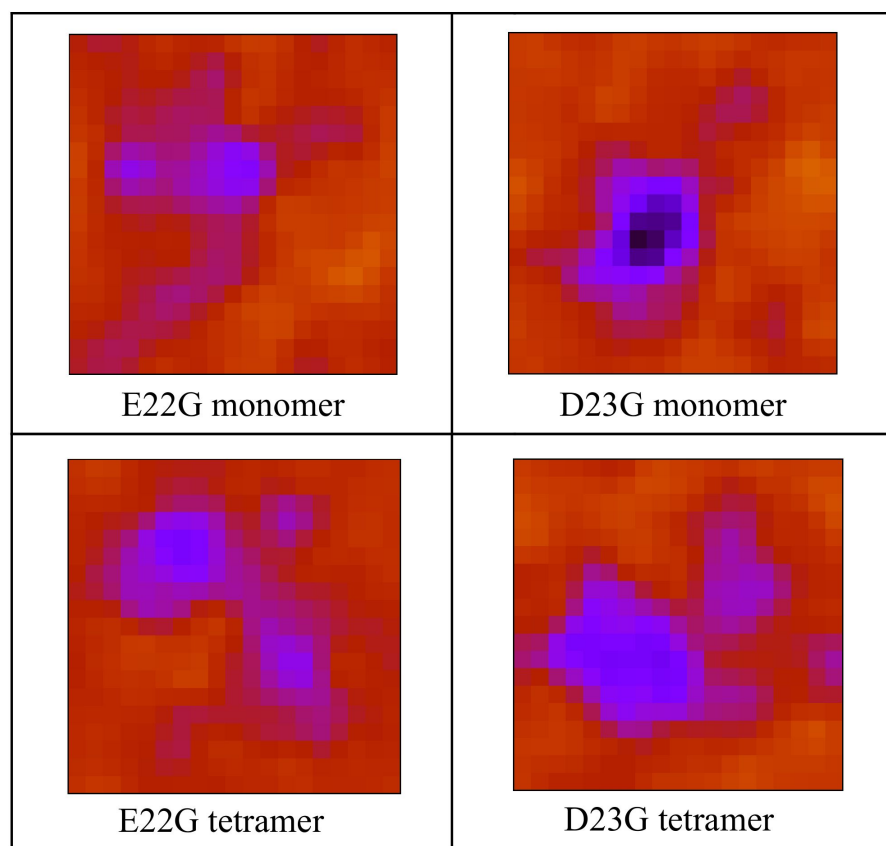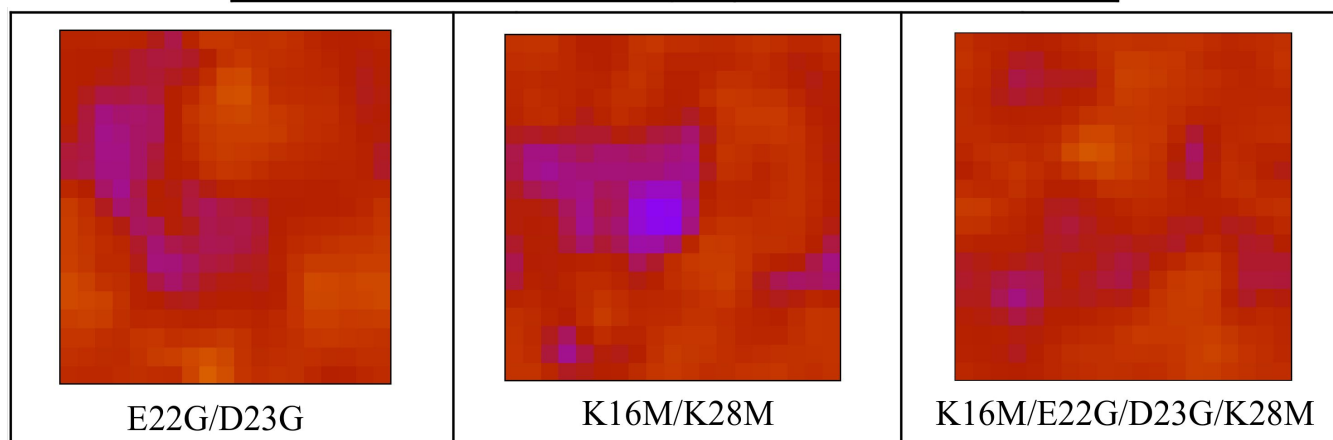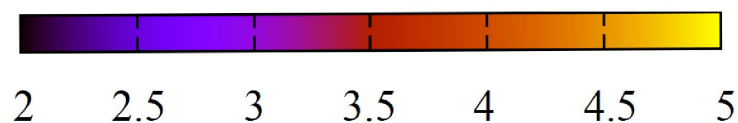

**Figure S9:** Bilayer phosphate-to-phosphate thickness, averaged over last 400 ns of the 500 ns MD simulations of  $A\beta_{1-42}$  mutants (monomers and tetramers). For the coloring explanation, see Fig. S11.

## Deuterium order parameters for A $\beta_{1-42}$ (monomer)-POPC bilayer systems

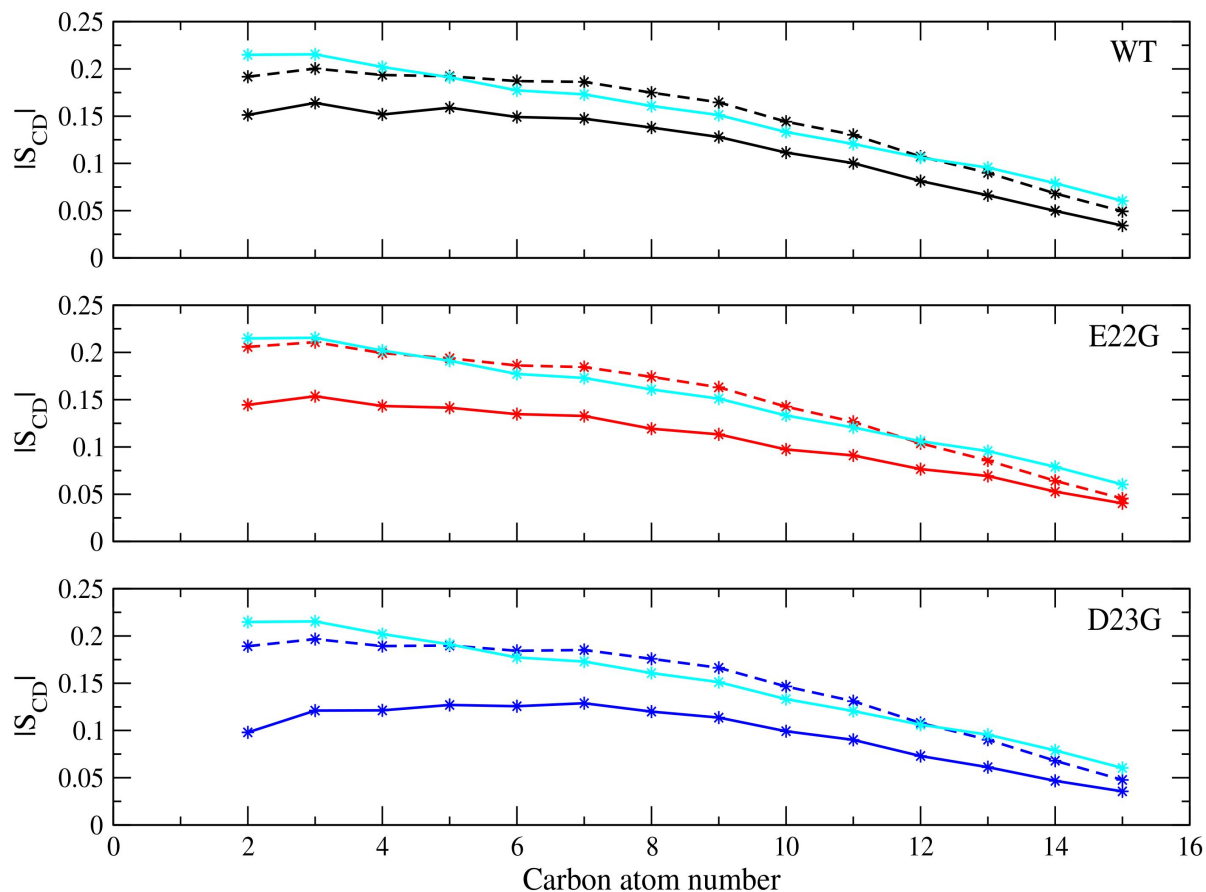

**Figure S10:** Time-averaged (over the last 400 ns of the MD simulations) order parameter  $S_{CD}$  of the palmitoyl chain of the POPC lipids. Results are shown for wild type and mutant A $\beta_{1-42}$  and are distinguished for the lipids within 5 Å of A $\beta_{1-42}$  (solid) and for the lipids >5 Å away from A $\beta_{1-42}$  (dashed). For comparison,  $S_{CD}$  of the palmitoyl chain obtained from a 100 ns MD run of peptide-free POPC bilayer is also presented (cyan).

## Deuterium order parameters for A $\beta_{1-42}$ (monomer)-POPC bilayer systems

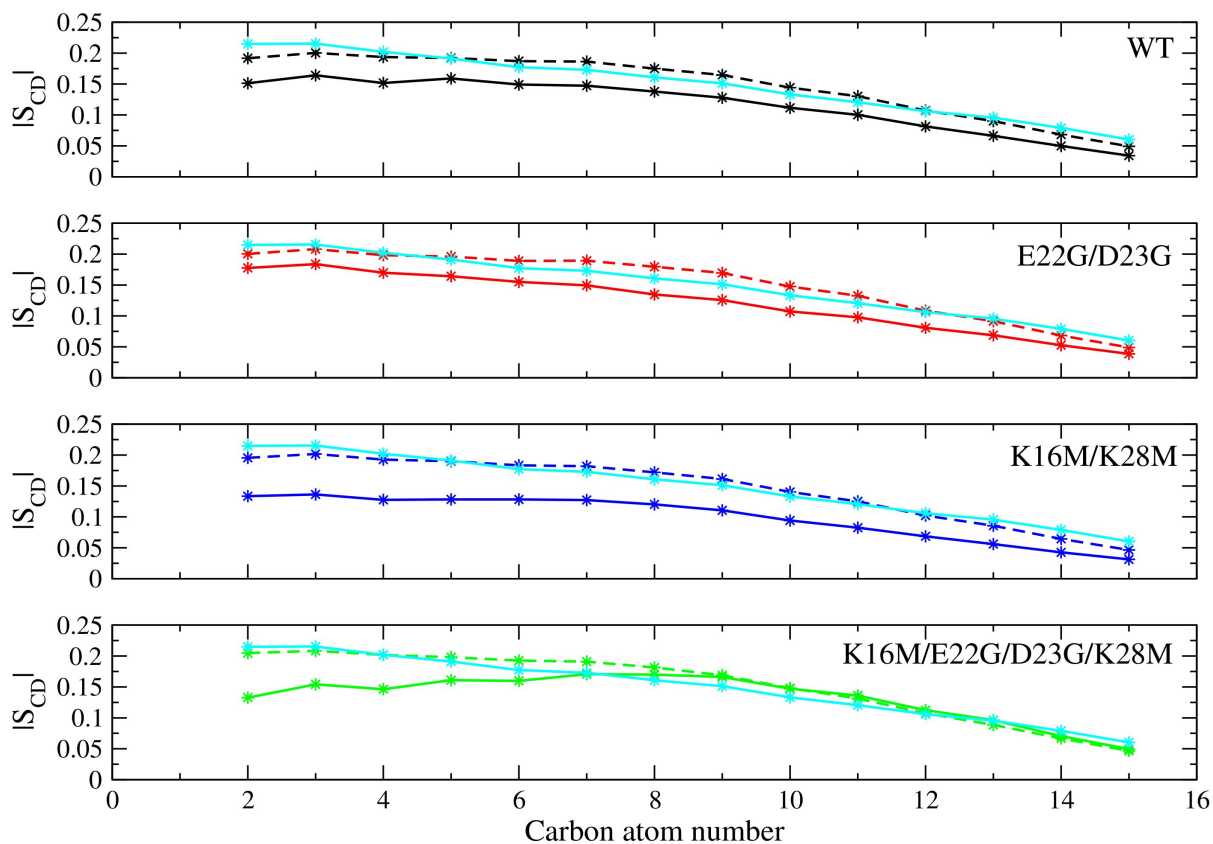

**Figure S11:** Time-averaged (over the last 400 ns of the MD simulations) order parameter  $S_{CD}$  of the palmitoyl chain of the POPC lipids. Results are shown for wild type and mutant A $\beta_{1-42}$  and are distinguished for the lipids within 5 Å of A $\beta_{1-42}$  (solid) and for the lipids >5 Å away from A $\beta_{1-42}$  (dashed). For comparison,  $S_{CD}$  of the palmitoyl chain obtained from a 100 ns MD run of peptide-free POPC bilayer is also presented (cyan).

## Deuterium order parameters for A $\beta$ <sub>1-42</sub> (tetramer)-POPC bilayer systems

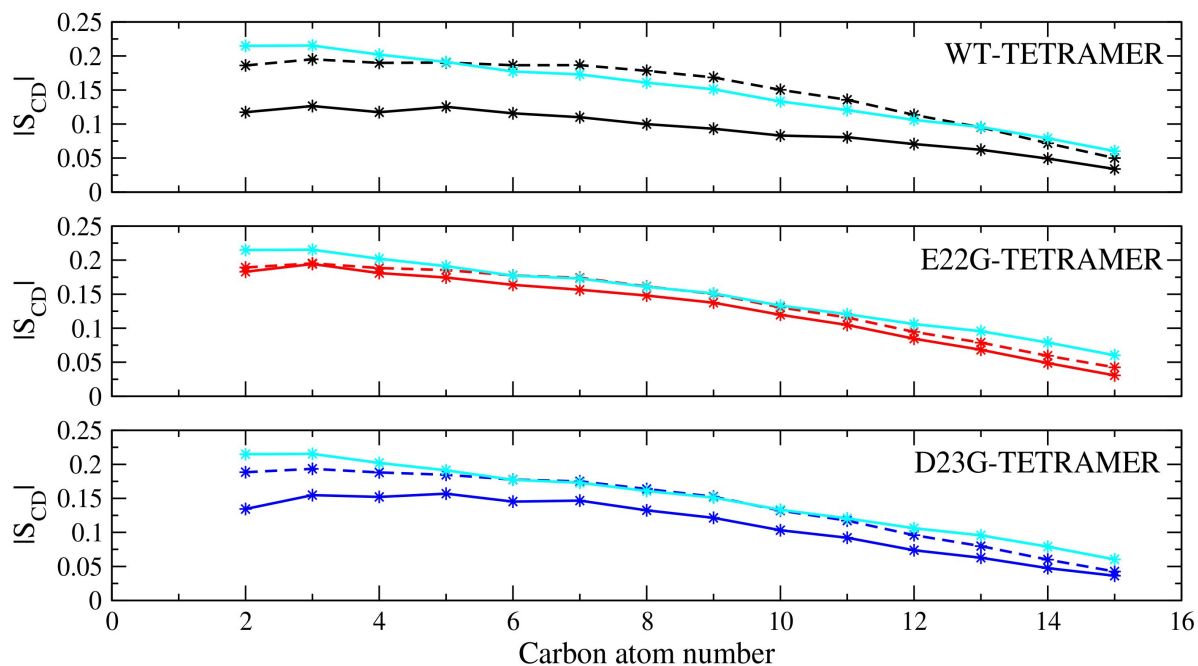

**Figure S12:** Time-averaged (over the last 400 ns of the MD simulations) order parameter  $S_{CD}$  of the palmitoyl chain of the POPC lipids. Results are shown for wild type and mutant A $\beta$ <sub>1-42</sub> and are distinguished for the lipids within 5 Å of A $\beta$ <sub>1-42</sub> (solid) and for the lipids >5 Å away from A $\beta$ <sub>1-42</sub> (dashed). For comparison,  $S_{CD}$  of the palmitoyl chain obtained from a 100 ns MD run of peptide-free POPC bilayer is also presented (cyan).
